# Supplementary material
Source: Springer Nature journal article supplement (https://www.springermedizin.de/resource/supplementary/12963_2011_153_MOESM7_ESM.pdf/9572772)

# Multiple Cause Assignment

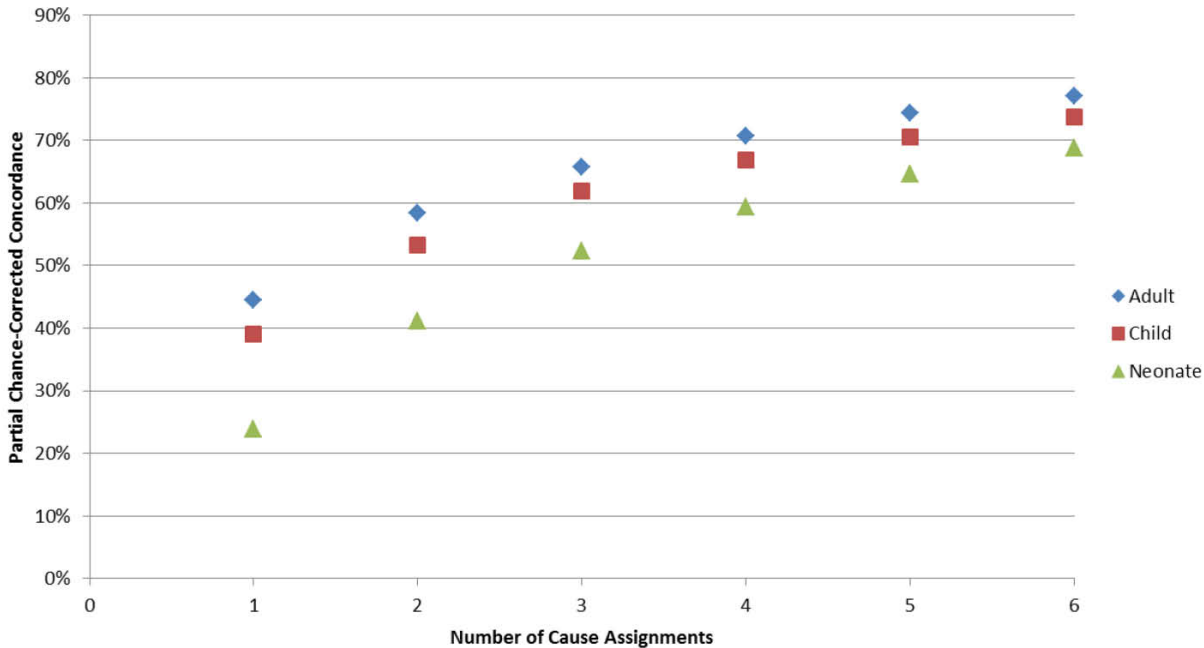

Supplement: MOESM7 [file 9572772]
